# Supplementary material for: The Role of QRS Complex and ST-Segment in Major Adverse Cardiovascular Events Prediction in Patients with ST Elevated Myocardial Infarction: A 6-Year Follow-Up Study
Source: MDPI journal article supplement (doi:10.3390/diagnostics14101042), 2024-05-17
Supplement: s1 [file s1]

**Table S1.** Culprit vessel and treatment data

| <b>Variables</b>                    | <b>Whole sample (N = 200)</b> | <b>Symptoms duration of less than 6 hours (N = 100)</b> | <b>Symptoms duration of more than 6 hours (N = 100)</b> | <b>P value</b> |
|-------------------------------------|-------------------------------|---------------------------------------------------------|---------------------------------------------------------|----------------|
| <b>MI localization</b>              |                               |                                                         |                                                         |                |
| <b>Wide-anterior</b>                | 26 (13%)                      | 8                                                       | 18                                                      | 0,058          |
| <b>Anteroseptal</b>                 | 26 (13%)                      | 9                                                       | 17                                                      | 0,141          |
| <b>Anterolateral</b>                | 15 (8%)                       | 7                                                       | 8                                                       | 1,000          |
| <b>Anteroseptoapical</b>            | 10 (5%)                       | 4                                                       | 6                                                       | 0,746          |
| <b>Lateral</b>                      | 4 (2%)                        | 1                                                       | 3                                                       | 0,614          |
| <b>Inferior</b>                     | 60 (30%)                      | 31                                                      | 29                                                      | 0,877          |
| <b>Posterior-Inferior</b>           | 39 (20%)                      | 29                                                      | 10                                                      | <b>0,001</b>   |
| <b>Posterior-inferior-lateral</b>   | 18 (9%)                       | 9                                                       | 9                                                       | 1,000          |
| <b>Circular</b>                     | 2 (1%)                        | 2                                                       | 0                                                       | 0,477          |
| <b>PCI/CABG arteries</b>            |                               |                                                         |                                                         |                |
| <b>LAD</b>                          | 57 (29%)                      | 21                                                      | 36                                                      | <b>0,028</b>   |
| <b>LAD+RCA</b>                      | 22 (11%)                      | 13                                                      | 9                                                       | 0,498          |
| <b>LAD+RCX</b>                      | 6 (3%)                        | 4                                                       | 2                                                       | 0,678          |
| <b>LAD+OM1</b>                      | 1 (1%)                        | 0                                                       | 1                                                       | 1,000          |
| <b>LAD+OM2</b>                      | 1 (1%)                        | 0                                                       | 1                                                       | 1,000          |
| <b>LAD+D1</b>                       | 1 (1%)                        | 1                                                       | 0                                                       | 1,000          |
| <b>LAD+RIM</b>                      | 1 (1%)                        | 1                                                       | 0                                                       | 1,000          |
| <b>RCA</b>                          | 69 (35%)                      | 43                                                      | 26                                                      | <b>0,017</b>   |
| <b>D1</b>                           | 2 (1%)                        | 1                                                       | 1                                                       | 1,000          |
| <b>D1+RCA</b>                       | 1 (1%)                        | 0                                                       | 1                                                       | 1,000          |
| <b>RCX+RCA</b>                      | 6 (3%)                        | 4                                                       | 2                                                       | 0,678          |
| <b>RIA+RCX+RCA</b>                  | 12 (6%)                       | 7                                                       | 5                                                       | 0,766          |
| <b>OM1</b>                          | 6 (3%)                        | 1                                                       | 5                                                       | 0,214          |
| <b>OM2</b>                          | 4 (2%)                        | 1                                                       | 3                                                       | 0,614          |
| <b>RCX</b>                          | 7 (4%)                        | 3                                                       | 4                                                       | 1,000          |
| <b>PD</b>                           | 1 (1%)                        | 0                                                       | 1                                                       | 1,000          |
| <b>RPL</b>                          | 1 (1%)                        | 0                                                       | 1                                                       | 1,000          |
| <b>OM2+RCA</b>                      | 1 (1%)                        | 0                                                       | 1                                                       | 1,000          |
| <b>RCA+RPL</b>                      | 1 (1%)                        | 0                                                       | 1                                                       | 1,000          |
| <b>Infarct-Related Artery (IRA)</b> |                               |                                                         |                                                         |                |
| <b>RCA</b>                          | 99 (50%)                      | 63                                                      | 36                                                      | <b>0,000</b>   |
| <b>LAD</b>                          | 75 (38%)                      | 28                                                      | 47                                                      | <b>0,009</b>   |
| <b>D1</b>                           | 3 (2%)                        | 1                                                       | 2                                                       | 1,000          |
| <b>PD</b>                           | 2 (1%)                        | 0                                                       | 2                                                       | 0,477          |
| <b>OM1</b>                          | 6 (3%)                        | 1                                                       | 5                                                       | 0,214          |
| <b>RCX</b>                          | 10 (5%)                       | 6                                                       | 4                                                       | 0,746          |
| <b>OM2</b>                          | 4 (2%)                        | 1                                                       | 3                                                       | 0,614          |
| <b>RPL</b>                          | 1 (1%)                        | 0                                                       | 1                                                       | 1,000          |

|                                             |           |                       |                       |              |
|---------------------------------------------|-----------|-----------------------|-----------------------|--------------|
| <b>Arterial segment</b>                     |           |                       |                       |              |
| <b>Proximal</b>                             | 77 (39%)  | 36                    | 41                    | 0,561        |
| <b>Medial</b>                               | 97 (49%)  | 46                    | 51                    | 0,571        |
| <b>Distal</b>                               | 26 (13%)  | 18                    | 8                     | 0,058        |
| <b>Degree of stenosis - IRA</b>             | 99,29     | 100.0 [100.0 - 100.0] | 100.0 [100.0 - 100.0] | 0,105        |
| <b>Cardiac dominance</b>                    |           |                       |                       |              |
| <b>Right coronary artery</b>                | 181 (91%) | 88                    | 93                    | 0,335        |
| <b>Circumflex artery</b>                    | 12 (6%)   | 8                     | 4                     | 0,372        |
| <b>Both</b>                                 | 7 (4%)    | 4                     | 3                     | 1,000        |
| <b>Door-to-balloon time (min)</b>           | 47.2      | 42.0 [31.5 - 54.25]   | 40.5 [34.75 - 55.0]   | 0,672        |
| <b>Predilatation</b>                        | 153 (77%) | 73                    | 80                    | 0,317        |
| <b>Direct implantation</b>                  | 31 (16%)  | 15                    | 16                    | 1,000        |
| <b>Thromboaspiration</b>                    | 33 (17%)  | 23                    | 10                    | <b>0,022</b> |
| <b>Stented arteries</b>                     |           |                       |                       |              |
| <b>LAD</b>                                  | 64 (32%)  | 24                    | 40                    | <b>0,023</b> |
| <b>LAD+RCA</b>                              | 15 (8%)   | 8                     | 7                     | 1,000        |
| <b>LAD+RCX</b>                              | 4 (2%)    | 2                     | 2                     | 1,000        |
| <b>LAD+OM1</b>                              | 1 (1%)    | 0                     | 1                     | 1,000        |
| <b>LAD+RIM</b>                              | 1 (1%)    | 1                     | 0                     | 1,000        |
| <b>LAD+D1</b>                               | 1 (1%)    | 1                     | 0                     | 1,000        |
| <b>RCA</b>                                  | 79 (40%)  | 51                    | 28                    | <b>0,001</b> |
| <b>RCX+RCA</b>                              | 6 (3%)    | 4                     | 2                     | 0,678        |
| <b>PD</b>                                   | 1 (1%)    | 0                     | 1                     | 1,000        |
| <b>RIA+RCX+RCA</b>                          | 3 (2%)    | 1                     | 2                     | 1,000        |
| <b>RCX</b>                                  | 8 (4%)    | 4                     | 4                     | 1,000        |
| <b>D1</b>                                   | 3 (2%)    | 1                     | 2                     | 1,000        |
| <b>RCA+RPL</b>                              | 3 (2%)    | 1                     | 2                     | 1,000        |
| <b>OM1</b>                                  | 5 (3%)    | 1                     | 4                     | 0,365        |
| <b>OM2</b>                                  | 4 (2%)    | 1                     | 3                     | 0,614        |
| <b>OM1+RCA</b>                              | 1 (1%)    | 0                     | 1                     | 1,000        |
| <b>OM2+RCA</b>                              | 1 (1%)    | 0                     | 1                     | 1,000        |
| <b>Compromised collateral vessel</b>        | 24 (12%)  | 15                    | 9                     | 0,277        |
| <b>Kissing technique</b>                    |           |                       |                       |              |
| <b>No</b>                                   | 184 (92%) | 92                    | 92                    | 1,000        |
| <b>PTCA-PTCA</b>                            | 15 (8%)   | 7                     | 8                     | 1,000        |
| <b>ST-ST</b>                                | 1 (1%)    | 1                     | 0                     | 1,000        |
| <b>Bifurcation technique</b>                | 1 (1%)    | 1                     | 0                     | 1,000        |
| <b>Additional work-up</b>                   |           |                       |                       |              |
| <b>No</b>                                   | 15 (8%)   | 72                    | 81                    | 0,182        |
| <b>PCI during the same hospitalization</b>  | 184 (92%) | 14                    | 11                    | 0,669        |
| <b>PCI during the other hospitalization</b> | 1 (1%)    | 11                    | 7                     | 0,459        |

|                                              |            |                     |                     |              |
|----------------------------------------------|------------|---------------------|---------------------|--------------|
| <b>CABG during the other hospitalization</b> | 1 (1%)     | 3                   | 1                   | 0,614        |
| <b>Number of implanted stents</b>            | 1,4        | 1.0 [1.0 - 2.0]     | 1.0 [1.0 - 2.0]     | 0,105        |
| <b>Total stent length (mm)</b>               | 30,1       | 25.5 [18.0 - 35.25] | 26.0 [20.0 - 40.25] | 0,067        |
| <b>Information about the stented artery:</b> |            |                     |                     |              |
| <b>Stent length (mm)</b>                     | 22,6       | 21.0 [18.0 - 26.0]  | 23.0 [18.0 - 28.0]  | 0,055        |
| <b>Stent diameter</b>                        | 3,1        | 3.0 [3.0 - 3.5]     | 3.0 [3.0 - 3.5]     | 0,559        |
| <b>Atmosphere</b>                            | 13,3       | 12.0 [12.0 - 16.0]  | 14.0 [12.0 - 15.0]  | 0,604        |
| <b>Type of the stent</b>                     |            |                     |                     | <b>0,010</b> |
| <b>Bare-metal stent</b>                      | 111 (56%)  | 65                  | 46                  |              |
| <b>Drug-eluted stent</b>                     | 89 (45%)   | 35                  | 54                  |              |
| <b>Stented coronary artery</b>               |            |                     |                     |              |
| <b>RCA</b>                                   | 97 (49%)   | 63                  | 34                  | <b>0,000</b> |
| <b>LAD</b>                                   | 75 (38%)   | 28                  | 47                  | <b>0,009</b> |
| <b>D1</b>                                    | 3 (2%)     | 1                   | 2                   | 1,000        |
| <b>PD</b>                                    | 2 (1%)     | 0                   | 2                   | 0,477        |
| <b>OM1</b>                                   | 6 (3%)     | 1                   | 5                   | 0,214        |
| <b>RCX</b>                                   | 10 (5%)    | 6                   | 4                   | 0,746        |
| <b>OM2</b>                                   | 4 (2%)     | 1                   | 3                   | 0,614        |
| <b>RIM</b>                                   | 2 (1%)     | 0                   | 2                   | 0,477        |
| <b>RPL</b>                                   | 1 (1%)     | 0                   | 1                   | 1,000        |
| <b>Patients with optimal outcome</b>         | 200 (100%) | 100                 | 100                 | 1,000        |
| <b>Complications</b>                         |            |                     |                     |              |
| <b>Without</b>                               | 193 (97%)  | 98                  | 95                  | 0,442        |
| <b>Coronary artery dissection</b>            | 6 (3%)     | 2                   | 4                   | 0,678        |
| <b>Death in a catheterization laboratory</b> | 1 (1%)     | 0                   | 1                   | 1,000        |
| <b>Pre-PCI TIMI flow</b>                     |            |                     |                     |              |
| <b>0</b>                                     | 166 (83%)  | 84                  | 82                  | 0,851        |
| <b>0/1</b>                                   | 3 (2%)     | 1                   | 2                   | 1,000        |
| <b>1</b>                                     | 6 (3%)     | 4                   | 2                   | 0,678        |
| <b>1/2</b>                                   | 2 (1%)     | 1                   | 1                   | 1,000        |
| <b>2</b>                                     | 13 (7%)    | 6                   | 7                   | 1,000        |
| <b>2/3</b>                                   | 4 (2%)     | 2                   | 2                   | 1,000        |
| <b>3</b>                                     | 6 (3%)     | 2                   | 4                   | 0,678        |
| <b>Post-PCI TIMI flow</b>                    |            |                     |                     |              |
| <b>0</b>                                     | 1 (1%)     | 1                   | 0                   | 1,000        |
| <b>1</b>                                     | 1 (1%)     | 1                   | 0                   | 1,000        |
| <b>1/2</b>                                   | 3 (2%)     | 0                   | 3                   | 0,245        |
| <b>2</b>                                     | 46 (23%)   | 19                  | 27                  | 0,240        |
| <b>2/3</b>                                   | 10 (5%)    | 5                   | 5                   | 1,000        |

|                                      |           |    |    |       |
|--------------------------------------|-----------|----|----|-------|
| <b>3</b>                             | 139 (70%) | 74 | 65 | 0,219 |
| <b>TIMI MPG</b>                      |           |    |    |       |
| <b>4</b>                             | 127 (64%) | 64 | 63 | 1,000 |
| <b>3</b>                             | 59 (30%)  | 28 | 31 | 0,756 |
| <b>2</b>                             | 9 (5%)    | 6  | 3  | 0,495 |
| <b>1</b>                             | 5 (3%)    | 2  | 3  | 1,000 |
| <b>GP IIB/IIIa</b>                   | 75 (38%)  | 40 | 35 | 0,559 |
| <b>Fibrinolysis due to no reflow</b> | 1 (1%)    | 1  | 0  | 1,000 |

PCI, Percutaneous Coronary Intervention; CABG, Coronary Artery Bypass Grafting; LAD, Left Anterior Descending artery; RCA, Right Coronary Artery; RCX, Circumflex Artery; OM1, First Obtuse Marginal artery; OM2, Second Obtuse Marginal artery; D1, First Diagonal artery; RIM, Ramus Intermedius artery; RIA, Right Interventricular Artery; PD, postero descending; RPL – ramus postero lateralis; PTCA, Percutaneous Transluminal Coronary Angioplasty; TIMI, Thrombolysis In Myocardial Infarction; MPG, Myocardial Perfusion Grade; GP, glycoprotein;

**Table S2.** Additional 6-month follow-up data

| <b>Variables</b>                                        | <b>Whole sample (N = 200)</b> | <b>Symptoms duration of less than 6 hours (N = 100)</b> | <b>Symptoms duration of more than 6 hours (N = 100)</b> | <b>P value</b> |
|---------------------------------------------------------|-------------------------------|---------------------------------------------------------|---------------------------------------------------------|----------------|
| <b>Ischemia assessment</b>                              |                               |                                                         |                                                         |                |
| <b>Wasn't performed</b>                                 | 124 (62%)                     | 53                                                      | 71                                                      | <b>0,013</b>   |
| <b>Positive ergometric test</b>                         | 2 (1%)                        | 0                                                       | 2                                                       | 0,477          |
| <b>Negative ergometric test</b>                         | 60 (30%)                      | 41                                                      | 19                                                      | <b>0,001</b>   |
| <b>Positive stress echocardiography</b>                 | 2 (1%)                        | 1                                                       | 1                                                       | 1,000          |
| <b>Negative stress echocardiography</b>                 | 10 (5%)                       | 5                                                       | 5                                                       | 1,000          |
| <b>Positive SPECT</b>                                   | 1 (1%)                        | 0                                                       | 1                                                       | 1,000          |
| <b>Negative SPECT</b>                                   | 1 (1%)                        | 0                                                       | 1                                                       | 1,000          |
| <b>6-months reintervention due to possible ischemia</b> | 7 (4%)                        | 3                                                       | 4                                                       | 1,000          |
| <b>Atrial Fibrillation</b>                              |                               |                                                         |                                                         |                |
| <b>Without</b>                                          | 176 (88%)                     | 88                                                      | 88                                                      | 1,000          |
| <b>New onset (transitory) during hospitalization</b>    | 16 (8%)                       | 9                                                       | 7                                                       | 0,794          |
| <b>New onset (permanent) during hospitalization</b>     | 4 (2%)                        | 1                                                       | 3                                                       | 0,614          |
| <b>New onset (permanent) during the follow-up</b>       | 1 (1%)                        | 1                                                       | 0                                                       | 1,000          |
| <b>Permanent</b>                                        | 3 (2%)                        | 1                                                       | 2                                                       | 1,000          |

SPECT, Single Photon Emission Computed Tomography
